# Supplementary material for: The Effects of High Fiber Rye, Compared to Refined Wheat, on Gut Microbiota Composition, Plasma Short Chain Fatty Acids, and Implications for Weight Loss and Metabolic Risk Factors (the RyeWeight Study)
Source: MDPI journal article supplement (doi:10.3390/nu14081669), 2022-04-17
Supplement: s1 [file s1]

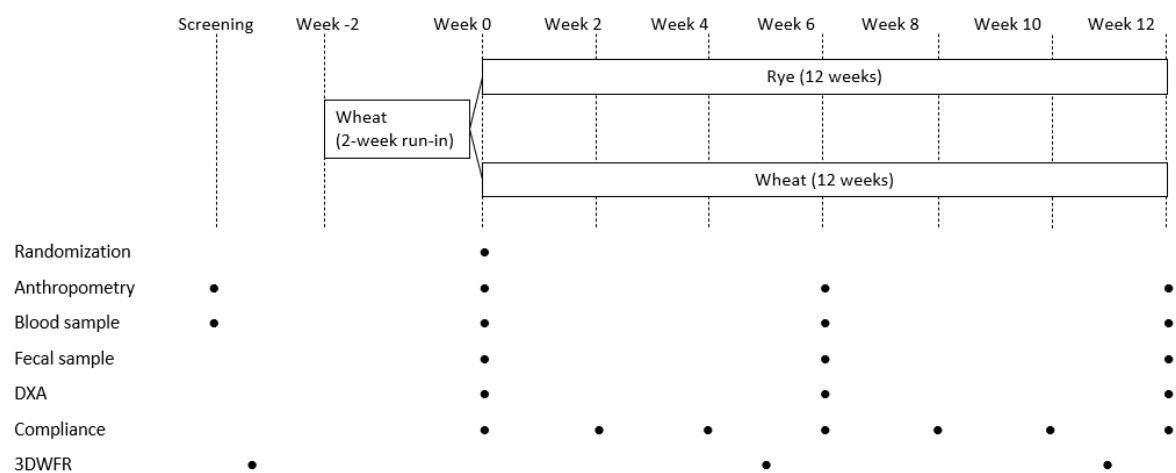

**Supplemental figure S1:** Design of the RyeWeight study. Abbreviations: DXA, dual-energy x-ray absorptiometry; 3DWFR, 3-day weighed food record.

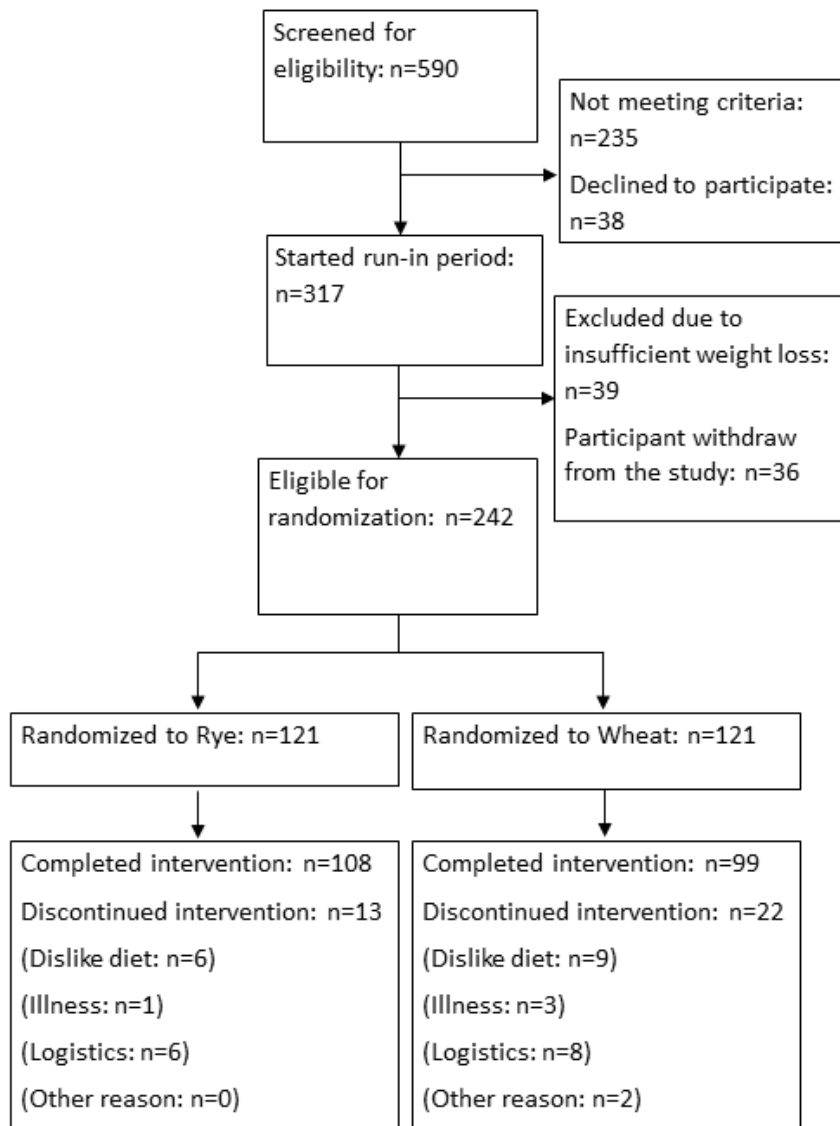

**Supplemental figure S2:** Flow chart of the participants in the RyeWeight study

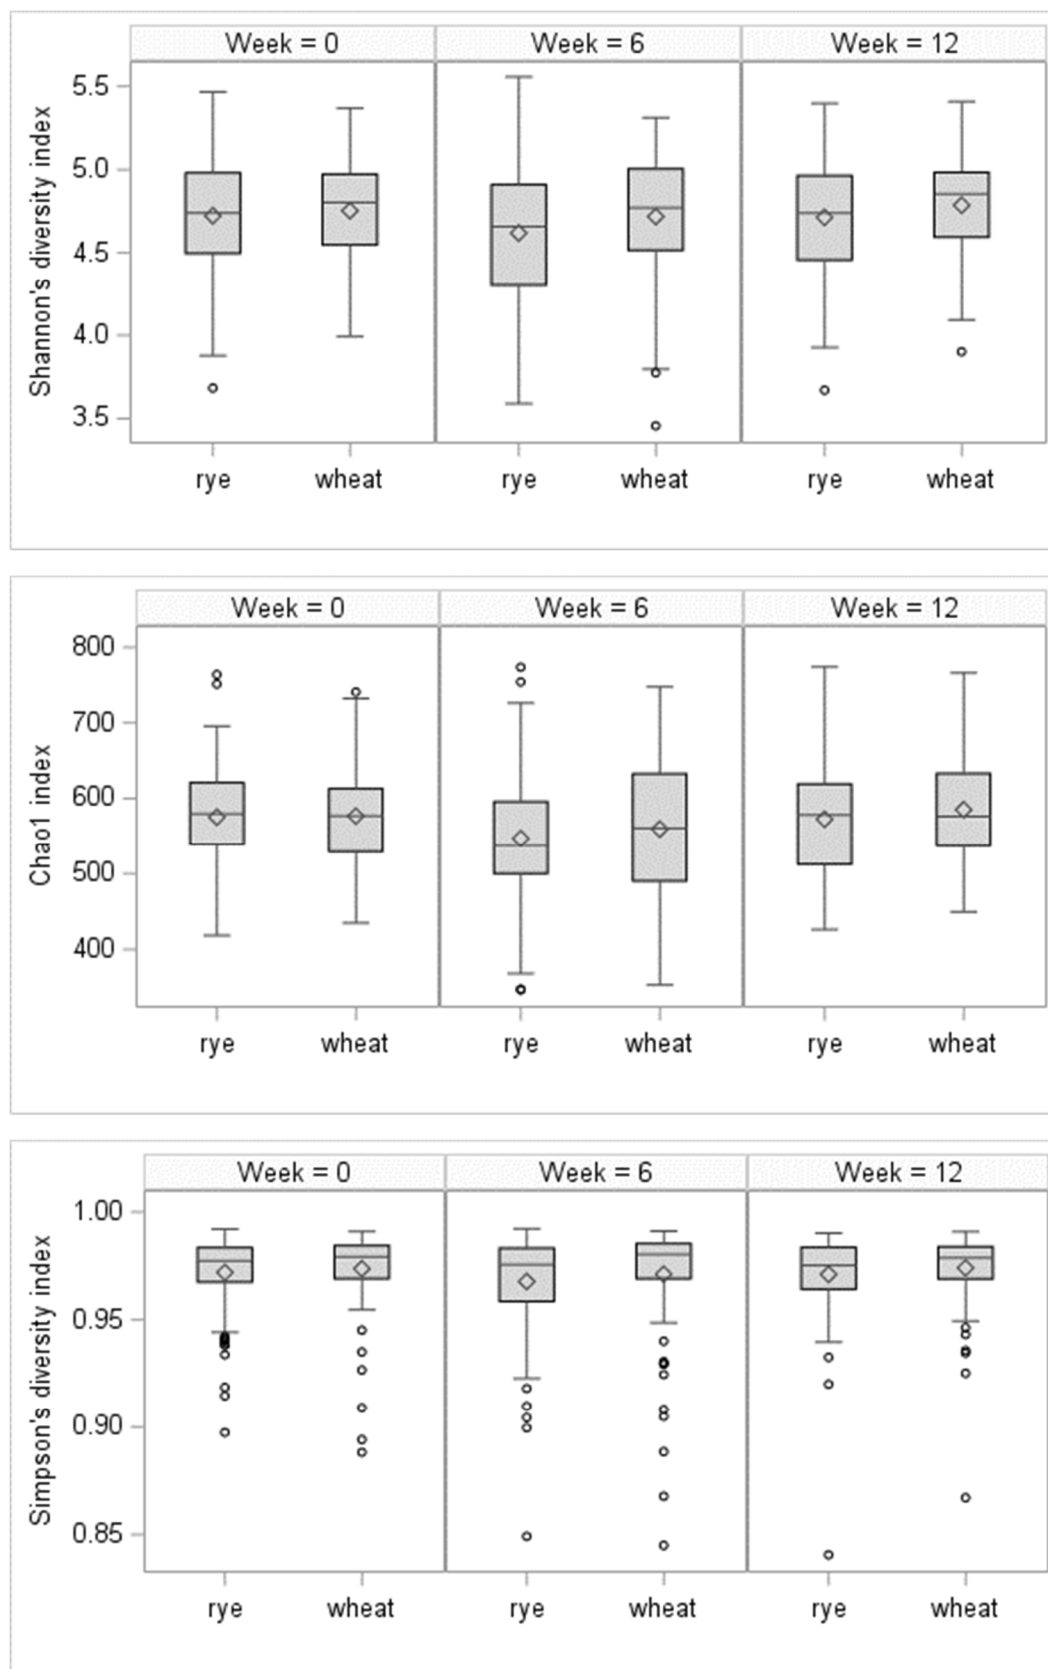

**Supplemental figure S3:** Alpha diversity, shown as Shannon's diversity index (top), Chao1 index (middle) and Simpson's index (bottom) in the rye and the wheat groups at week 0, week 6 and week 12. There was no significant difference between the groups at any time point ( $p > 0.05$ ).

**Supplemental table S1:** Overview of the intervention products used in the RyeWeight study

|                              | <b>Cereal ingredients</b>                                                           | <b>Fermentation (breads)</b> | <b>Supplier (Commercial name)</b>   |
|------------------------------|-------------------------------------------------------------------------------------|------------------------------|-------------------------------------|
| Extruded rye puffs           | Whole grain rye flour (100% of flour weight)                                        | -                            | Lantmännen (-*)                     |
| Rolled rye flakes            | 100% wholegrain rye                                                                 | -                            | Lantmännen (AXA Rågflingor)         |
| Rye crisp bread 'Rågi'       | Whole grain rye flour (73% of flour weight), sifted rye flour (27% of flour weight) | Yeast                        | Barilla (Wasa Rågi)                 |
| Rye crisp bread 'Husman'     | Whole grain rye flour (100% of flour weight)                                        | Yeast                        | Barilla (Wasa Husman)               |
| Rye crisp bread 'Sport'      | Whole grain rye flour (100% of flour weight)                                        | Yeast                        | Barilla (Wasa Sport)                |
| Rye crisp bread 'Delikatess' | Whole grain rye flour (100% of flour weight)                                        | Unfermented                  | Barilla (Wasa Delikatess)           |
| Soft rye bread               | Whole grain rye flour (100% of flour weight)                                        | Yeast                        | Lantmännen (-*)                     |
| Extruded wheat puffs         | Sifted wheat flour (100% of flour weight)                                           | -                            | Lantmännen (-*)                     |
| Wheat semolina               | 100% Sifted wheat                                                                   | -                            | Lantmännen (AXA mannagryn)          |
| Wheat crisp bread            | Sifted wheat flour (100% of flour weight)                                           | Yeast                        | Barilla (Wasa Frukost)              |
| Soft wheat bread             | Sifted wheat flour (100% of flour weight)                                           | Yeast                        | Lantmännen (Schulstad Sandwino Sub) |

\*Product was developed and produced for the study and is not commercially available.

**Supplemental table S2:** Composition of intervention products, per 100 g edible product. Participants were instructed to consume 60 g breakfast cereals (puffs or flakes/semolina), 4-6 slice of crisp bread (53-66g) and one serving of soft bread (Wheat: 70g, rye: 119g) per day, why the intake as per protocol varied depending on the participants choice of crisp bread and breakfast cereals.

|                                                                       |           | Product weight (g) | Energy (kcal) | CHO (g) | Protein (g) | Fat (g) | Dietary fiber (g) <sup>+</sup> |        |         | Arabinoxylans (g) |       |         | Fructans (g) | Klason lignin (g) | Glucose (g) | Total AR (mg) | C17:0/C21:0 ratio |
|-----------------------------------------------------------------------|-----------|--------------------|---------------|---------|-------------|---------|--------------------------------|--------|---------|-------------------|-------|---------|--------------|-------------------|-------------|---------------|-------------------|
|                                                                       |           |                    |               |         |             |         | Total                          | Extr.  | Unextr. | Total             | Extr. | Unextr. |              |                   |             |               |                   |
| Per 100g edible product                                               |           |                    |               |         |             |         |                                |        |         |                   |       |         |              |                   |             |               |                   |
| <i>Rye products</i>                                                   |           |                    |               |         |             |         |                                |        |         |                   |       |         |              |                   |             |               |                   |
|                                                                       |           | 100                | 345.6         | 64.0    | 9.0         | 2.2     | 16.78                          | 6.86   | 9.92    | 7.16              | 2.29  | 4.87    | 3.85         | 1.28              | 3.59        | 24.9          | 1.15              |
|                                                                       |           | 100                | 345.8         | 63.7    | 8.6         | 2.2     | 18.33                          | 7.41   | 10.92   | 8.34              | 3.29  | 5.05    | 3.02         | 1.34              | 4.69        | 35.8          | 0.98              |
|                                                                       |           | 100                | 339.8         | 65.9    | 8.8         | 1.4     | 14.14                          | 5.60   | 8.54    | 6.59              | 2.47  | 4.10    | 2.30         | 0.65              | 3.74        | 39.5          | 0.93              |
|                                                                       |           | 100                | 335.6         | 63.1    | 9.0         | 1.5     | 16.95                          | 6.65   | 10.30   | 8.16              | 2.98  | 5.18    | 2.45         | 1.24              | 4.18        | 39.7          | 1.00              |
|                                                                       |           | 100                | 337.5         | 63.6    | 8.4         | 1.6     | 17.50                          | 6.11   | 11.39   | 8.07              | 2.44  | 5.64    | 2.61         | 1.09              | 4.80        | 43.3          | 0.97              |
|                                                                       |           | 100                | 336.1         | 61.0    | 10.0        | 1.5     | 19.27                          | 7.39   | 11.88   | 8.43              | 2.54  | 5.89    | 3.79         | 1.19              | 4.96        | 38.3          | 0.97              |
|                                                                       |           | 100                | 225.6         | 34.4    | 7.5         | 4.1     | 10.62                          | 3.75   | 6.87    | 4.54              | 1.50  | 3.04    | 1.52         | 1.04              | 2.92        | 32.9          | 0.86              |
| <i>Wheat products</i>                                                 |           |                    |               |         |             |         |                                |        |         |                   |       |         |              |                   |             |               |                   |
|                                                                       |           | 100                | 367.7         | 73.4    | 11.5        | 1.9     | 5.42                           | 2.51   | 2.91    | 2.36              | 1.24  | 1.12    | 1.05         | 0.78              | 0.75        | 0.8           | nd**              |
|                                                                       |           | 100                | 353.5         | 75.0    | 10.0        | 0.8     | 2.95                           | 1.33   | 1.63    | 1.17              | 0.56  | 0.61    | 0.62         | 0.17              | 0.54        | nd*           | nd*               |
|                                                                       |           | 100                | 392.4         | 65.6    | 12.4        | 7.7     | 5.56                           | 1.52   | 4.04    | 2.56              | 0.86  | 1.69    | 0.39         | 0.50              | 1.50        | 4.1           | 0.05              |
|                                                                       |           | 100                | 252.2         | 43.3    | 13.7        | 1.9     | 3.53                           | 1.03   | 2.50    | 1.24              | 0.76  | 0.49    | 0.15         | 0.71              | 1.05        | 1.6           | nd**              |
| Average daily amount of intervention products prescribed per protocol |           |                    |               |         |             |         |                                |        |         |                   |       |         |              |                   |             |               |                   |
| Rye                                                                   | Mean      | 235                | 664           | 114.6   | 19.2        | 7.0     | 32.7                           | 12.3   | 20.4    | 14.4              | 4.9   | 9.5     | 5.4          | 2.6               | 8.4         | 80.01         | 0.93              |
|                                                                       | (minimum) | (232)              | (656)         | (112.5) | (18.8)      | (6.9)   | (30.2)                         | (11.5) | (18.7)  | (13.2)            | (4.5) | (8.7)   | (4.8)        | (2.3)             | (7.6)       | (75.00)       | (0.91)            |
|                                                                       | (maximum) | (239)              | (679)         | (117.5) | (19.8)      | (7.2)   | (34.2)                         | (12.9) | (21.6)  | (15.2)            | (5.4) | (10.0)  | (6.2)        | (2.7)             | (9.2)       | (86.62)       | (0.95)            |
| Wheat                                                                 | Mean      | 196                | 652           | 118.1   | 24.2        | 7.2     | 8.7                            | 2.9    | 5.8     | 3.6               | 1.6   | 2.0     | 0.9          | 1.1               | 2.1         | 4.09          | 0.03              |
|                                                                       | (minimum) | (196)              |               | (117.6) |             |         |                                | (2.5)  |         |                   |       |         |              | (0.9)             |             | (3.86)        | (0.03)            |

(maximum) (196) (648) (118.6) (23.8) (6.9) (7.9) (3.2) (5.4) (3.3) (1.4) (1.8) (0.7) (1.3) (2.0) (4.33) (0.04)  
(656) (24.7) (7.6) (9.4) (6.2) (4.0) (1.8) (2.1) (1.0) (2.2)

<sup>†</sup>Including arabinoxylans, fructans, klason lignin and glucose, <sup>\*</sup>no alkylresorcinol detected in the product, <sup>\*\*</sup>no C17:0 detected in the product.

Abbreviations: CHO, carbohydrate; extr, extractable, unextr, unextractable; AR, alkylresorcinols.

**Supplemental table S3:** Bacteria that differed in abundance between the groups at week 6 and/or week 12 before FDR correction, but not after (bacteria that differed even after FDR are shown in results section of the paper).

|                                         |       | Week 0*             | Week 6*             | Week 12*            | p-value, raw** |               | p-value, FDR** |         |
|-----------------------------------------|-------|---------------------|---------------------|---------------------|----------------|---------------|----------------|---------|
|                                         |       |                     |                     |                     | Week 6         | Week12        | Week 6         | Week 12 |
| <i>Flavonifractor</i>                   | Wheat | 0.049 (0.038;0.064) | 0.033 (0.024;0.045) | 0.034 (0.025;0.045) | <b>0.0015</b>  | <b>0.0038</b> | 0.1545         | 0.3800  |
|                                         | Rye   | 0.048 (0.037;0.062) | 0.017 (0.013;0.023) | 0.02 (0.015;0.026)  |                |               |                |         |
| <i>Romboutsia</i>                       | Wheat | 0.091 (0.076;0.109) | 0.106 (0.088;0.128) | 0.104 (0.09;0.12)   | <b>0.004</b>   | <b>0.0061</b> | 0.3960         | 0.5978  |
|                                         | Rye   | 0.123 (0.103;0.146) | 0.079 (0.066;0.094) | 0.086 (0.075;0.1)   |                |               |                |         |
| <i>Erysipelatoclostridium</i>           | Wheat | 0.012 (0.009;0.016) | 0.006 (0.005;0.008) | 0.01 (0.007;0.013)  | <b>0.0103</b>  | <b>0.0024</b> | 0.9373         | 0.2496  |
|                                         | Rye   | 0.011 (0.008;0.014) | 0.004 (0.003;0.005) | 0.005 (0.004;0.007) |                |               |                |         |
| <i>[Eubacterium] xylanophilum group</i> | Wheat | 0.28 (0.238;0.328)  | 0.34 (0.292;0.396)  | 0.282 (0.24;0.331)  | <b>0.0012</b>  | <b>0.0083</b> | 0.1248         | 0.7802  |
|                                         | Rye   | 0.271 (0.232;0.316) | 0.45 (0.389;0.521)  | 0.361 (0.31;0.421)  |                |               |                |         |
| <i>Dorea</i>                            | Wheat | 0.848 (0.745;0.964) | 0.865 (0.756;0.989) | 0.841 (0.753;0.94)  | <b>0.0047</b>  | <b>0.0048</b> | 0.4606         | 0.4752  |
|                                         | Rye   | 0.732 (0.647;0.828) | 0.635 (0.558;0.722) | 0.651 (0.585;0.724) |                |               |                |         |
| <i>UBA1819</i>                          | Wheat | 0.067 (0.056;0.079) | 0.055 (0.047;0.065) | 0.06 (0.052;0.069)  | <b>0.011</b>   | <b>0.0038</b> | 0.9768         | 0.3800  |
|                                         | Rye   | 0.061 (0.052;0.072) | 0.04 (0.034;0.047)  | 0.044 (0.038;0.05)  |                |               |                |         |
| <i>Negativibacillus</i>                 | Wheat | 0.015 (0.011;0.021) | 0.012 (0.009;0.017) | 0.018 (0.013;0.025) | <b>0.0074</b>  | <b>0.0065</b> | 0.6808         | 0.6305  |
|                                         | Rye   | 0.011 (0.008;0.015) | 0.006 (0.005;0.009) | 0.009 (0.006;0.012) |                |               |                |         |
| <i>Blautia</i>                          | Wheat | 2.166 (1.879;2.496) | 2.126 (1.843;2.452) | 2.073 (1.821;2.359) | 0.0741         | <b>0.0015</b> | 0.9958         | 0.1575  |
|                                         | Rye   | 1.941 (1.694;2.224) | 1.72 (1.501;1.972)  | 1.54 (1.361;1.743)  |                |               |                |         |
| <i>Collinsella</i>                      | Wheat | 0.289 (0.24;0.348)  | 0.303 (0.256;0.358) | 0.464 (0.396;0.543) | <b>0.0065</b>  | <b>0.0076</b> | 0.6175         | 0.7296  |
|                                         | Rye   | 0.241 (0.202;0.289) | 0.211 (0.179;0.247) | 0.332 (0.286;0.386) |                |               |                |         |

|                                     |       |                     |                     |                     |               |               |        |        |
|-------------------------------------|-------|---------------------|---------------------|---------------------|---------------|---------------|--------|--------|
| <i>Shuttleworthia</i>               | Wheat | 0.011 (0.007;0.015) | 0.008 (0.006;0.011) | 0.005 (0.003;0.006) | <b>0.0248</b> | <b>0.0031</b> | 0.9958 | 0.3193 |
|                                     | Rye   | 0.009 (0.006;0.013) | 0.004 (0.003;0.006) | 0.002 (0.002;0.003) |               |               |        |        |
| <i>Monoglobus</i>                   | Wheat | 0.321 (0.289;0.357) | 0.35 (0.314;0.39)   | 0.307 (0.277;0.34)  | <b>0.0027</b> | 0.4912        | 0.2754 | 0.9854 |
|                                     | Rye   | 0.314 (0.284;0.347) | 0.281 (0.253;0.311) | 0.29 (0.263;0.32)   |               |               |        |        |
| <i>Coprococcus</i>                  | Wheat | 1.308 (1.166;1.468) | 1.527 (1.345;1.733) | 1.322 (1.195;1.463) | <b>0.0028</b> | <b>0.0353</b> | 0.2828 | 0.9854 |
|                                     | Rye   | 1.248 (1.118;1.393) | 1.192 (1.056;1.345) | 1.14 (1.035;1.256)  |               |               |        |        |
| <i>Lactococcus</i>                  | Wheat | 0.003 (0.002;0.004) | 0.002 (0.002;0.003) | 0.003 (0.002;0.004) | <b>0.0313</b> | <b>0.0086</b> | 0.9958 | 0.7998 |
|                                     | Rye   | 0.003 (0.002;0.003) | 0.002 (0.001;0.002) | 0.002 (0.002;0.002) |               |               |        |        |
| <i>Veillonella</i>                  | Wheat | 0.018 (0.013;0.024) | 0.015 (0.012;0.02)  | 0.024 (0.019;0.031) | <b>0.0071</b> | <b>0.0206</b> | 0.6674 | 0.9854 |
|                                     | Rye   | 0.023 (0.018;0.03)  | 0.028 (0.021;0.036) | 0.039 (0.03;0.05)   |               |               |        |        |
| <i>Eisenbergiella</i>               | Wheat | 0.013 (0.009;0.019) | 0.01 (0.007;0.014)  | 0.006 (0.005;0.009) | <b>0.0221</b> | <b>0.0077</b> | 0.9958 | 0.7315 |
|                                     | Rye   | 0.016 (0.011;0.022) | 0.006 (0.004;0.008) | 0.004 (0.003;0.005) |               |               |        |        |
| CAG_56                              | Wheat | 0.145 (0.116;0.181) | 0.203 (0.167;0.248) | 0.144 (0.116;0.179) | <b>0.0035</b> | 0.1831        | 0.3500 | 0.9854 |
|                                     | Rye   | 0.111 (0.089;0.137) | 0.127 (0.105;0.153) | 0.109 (0.089;0.134) |               |               |        |        |
| <i>Paludicola</i>                   | Wheat | 0.011 (0.008;0.015) | 0.007 (0.005;0.01)  | 0.006 (0.005;0.009) | <b>0.0049</b> | 0.5007        | 0.4753 | 0.9854 |
|                                     | Rye   | 0.01 (0.008;0.014)  | 0.004 (0.003;0.005) | 0.005 (0.004;0.007) |               |               |        |        |
| <i>Bifidobacterium</i>              | Wheat | 0.396 (0.319;0.492) | 0.498 (0.406;0.612) | 0.700 (0.582;0.842) | <b>0.0186</b> | <b>0.0152</b> | 0.9958 | 0.9854 |
|                                     | Rye   | 0.331 (0.269;0.408) | 0.606 (0.498;0.738) | 0.844 (0.707;1.007) |               |               |        |        |
| <i>[Eubacterium] eligens group</i>  | Wheat | 0.662 (0.558;0.785) | 0.63 (0.532;0.747)  | 0.498 (0.434;0.571) | <b>0.0073</b> | 0.0709        | 0.6789 | 0.9854 |
|                                     | Rye   | 0.648 (0.55;0.762)  | 0.473 (0.401;0.556) | 0.421 (0.369;0.48)  |               |               |        |        |
| <i>Adlercreutzia</i>                | Wheat | 0.063 (0.051;0.079) | 0.061 (0.048;0.078) | 0.072 (0.061;0.086) | <b>0.0115</b> | 0.1325        | 0.9890 | 0.9854 |
|                                     | Rye   | 0.054 (0.044;0.067) | 0.039 (0.031;0.048) | 0.059 (0.05;0.069)  |               |               |        |        |
| <i>Streptococcus</i>                | Wheat | 0.087 (0.072;0.106) | 0.067 (0.055;0.081) | 0.082 (0.069;0.099) | <b>0.0127</b> | 0.2400        | 0.9958 | 0.9854 |
|                                     | Rye   | 0.087 (0.072;0.104) | 0.049 (0.04;0.059)  | 0.071 (0.06;0.085)  |               |               |        |        |
| <i>Sutterella</i>                   | Wheat | 0.789 (0.645;0.965) | 0.779 (0.637;0.952) | 0.927 (0.759;1.133) | <b>0.0108</b> | 0.5359        | 0.9720 | 0.9854 |
|                                     | Rye   | 0.788 (0.65;0.955)  | 1.043 (0.86;1.264)  | 0.996 (0.822;1.206) |               |               |        |        |
| <i>Lachnospiraceae AC2044 group</i> | Wheat | 0.087 (0.065;0.116) | 0.12 (0.088;0.164)  | 0.094 (0.07;0.127)  | <b>0.0309</b> | <b>0.0231</b> | 0.9958 | 0.9854 |
|                                     | Rye   | 0.088 (0.067;0.117) | 0.188 (0.14;0.254)  | 0.151 (0.113;0.201) |               |               |        |        |
|                                     | Wheat | 0.133 (0.113;0.157) | 0.148 (0.126;0.172) | 0.127 (0.11;0.146)  | <b>0.0111</b> | 0.1559        | 0.9768 | 0.9854 |

|                                |       |                     |                     |                     |               |               |        |        |
|--------------------------------|-------|---------------------|---------------------|---------------------|---------------|---------------|--------|--------|
| <i>Lachnospiraceae</i> UCG 004 | Rye   | 0.142 (0.121;0.166) | 0.194 (0.168;0.226) | 0.147 (0.129;0.169) |               |               |        |        |
| <i>Colidextribacter</i>        | Wheat | 0.151 (0.135;0.17)  | 0.142 (0.127;0.158) | 0.165 (0.151;0.181) | 0.1379        | <b>0.0106</b> | 0.9958 | 0.9646 |
|                                | Rye   | 0.163 (0.146;0.182) | 0.13 (0.117;0.144)  | 0.145 (0.133;0.158) |               |               |        |        |
| <i>Butyrivibrio</i>            | Wheat | 0.070 (0.044;0.11)  | 0.044 (0.027;0.071) | 0.024 (0.015;0.039) | <b>0.0114</b> | 0.1673        | 0.9890 | 0.9854 |
|                                | Rye   | 0.071 (0.046;0.111) | 0.020 (0.013;0.032) | 0.016 (0.01;0.025)  |               |               |        |        |
| <i>Roseburia</i>               | Wheat | 1.719 (1.529;1.931) | 1.801 (1.587;2.044) | 1.897 (1.687;2.132) | 0.1122        | <b>0.024</b>  | 0.9958 | 0.9854 |
|                                | Rye   | 1.780 (1.592;1.99)  | 1.607 (1.424;1.814) | 1.620 (1.448;1.813) |               |               |        |        |
| <i>Candidatus Soleaferrea</i>  | Wheat | 0.008 (0.007;0.011) | 0.005 (0.004;0.006) | 0.006 (0.005;0.008) | 0.2326        | <b>0.0171</b> | 0.9958 | 0.9854 |
|                                | Rye   | 0.007 (0.005;0.008) | 0.004 (0.003;0.005) | 0.004 (0.003;0.005) |               |               |        |        |
| <i>Merdibacter</i>             | Wheat | 0.008 (0.006;0.011) | 0.006 (0.005;0.009) | 0.008 (0.006;0.012) | <b>0.0147</b> | 0.2419        | 0.9958 | 0.9854 |
|                                | Rye   | 0.010 (0.007;0.014) | 0.004 (0.003;0.006) | 0.007 (0.005;0.01)  |               |               |        |        |
| <i>Lachnospiraceae</i> UCG 001 | Wheat | 0.209 (0.171;0.255) | 0.224 (0.187;0.268) | 0.167 (0.137;0.203) | <b>0.017</b>  | 0.2158        | 0.9958 | 0.9854 |
|                                | Rye   | 0.185 (0.153;0.224) | 0.163 (0.137;0.193) | 0.135 (0.111;0.163) |               |               |        |        |
| <i>Incertae Sedis</i>          | Wheat | 0.18 (0.16;0.202)   | 0.24 (0.209;0.276)  | 0.288 (0.253;0.328) | <b>0.0325</b> | 0.1129        | 0.9958 | 0.9854 |
|                                | Rye   | 0.178 (0.159;0.2)   | 0.195 (0.171;0.223) | 0.249 (0.22;0.282)  |               |               |        |        |
| <i>Howardella</i>              | Wheat | 0.004 (0.003;0.005) | 0.005 (0.004;0.006) | 0.006 (0.005;0.008) | <b>0.021</b>  | 0.4056        | 0.9958 | 0.9854 |
|                                | Rye   | 0.004 (0.003;0.006) | 0.003 (0.003;0.004) | 0.006 (0.004;0.007) |               |               |        |        |
| <i>Phascolarctobacterium</i>   | Wheat | 0.124 (0.094;0.164) | 0.118 (0.088;0.158) | 0.166 (0.124;0.224) | 0.1849        | <b>0.0258</b> | 0.9958 | 0.9854 |
|                                | Rye   | 0.101 (0.077;0.132) | 0.083 (0.063;0.11)  | 0.099 (0.074;0.132) |               |               |        |        |
| <i>Intestinimonas</i>          | Wheat | 0.238 (0.213;0.265) | 0.202 (0.18;0.227)  | 0.229 (0.205;0.256) | <b>0.0378</b> | 0.1196        | 0.9958 | 0.9854 |
|                                | Rye   | 0.22 (0.198;0.245)  | 0.167 (0.149;0.187) | 0.199 (0.179;0.221) |               |               |        |        |
| <i>Oscillibacter</i>           | Wheat | 0.211 (0.186;0.239) | 0.191 (0.168;0.216) | 0.2 (0.173;0.23)    | <b>0.0299</b> | 0.2037        | 0.9958 | 0.9854 |
|                                | Rye   | 0.191 (0.169;0.215) | 0.153 (0.136;0.173) | 0.17 (0.149;0.195)  |               |               |        |        |
| <i>Anaerostipes</i>            | Wheat | 0.552 (0.478;0.637) | 0.662 (0.573;0.765) | 0.639 (0.562;0.726) | <b>0.0412</b> | 0.2104        | 0.9958 | 0.9854 |
|                                | Rye   | 0.498 (0.435;0.571) | 0.764 (0.666;0.877) | 0.684 (0.606;0.773) |               |               |        |        |
| <i>Lachnospira</i>             | Wheat | 0.465 (0.409;0.528) | 0.423 (0.362;0.494) | 0.479 (0.42;0.547)  | 0.3593        | <b>0.0432</b> | 0.9958 | 0.9854 |
|                                | Rye   | 0.425 (0.376;0.48)  | 0.37 (0.319;0.429)  | 0.388 (0.342;0.441) |               |               |        |        |



\*Relative abundance in % as geometric mean and 95% CI (raw unadjusted data, back transformed from log scale). \*\*Linear mixed model, adjusted for baseline abundance, data was log transformed before analysis. n(rye/wheat) =108/99.

**Supplemental table S4:** Correlations between changes in plasma short chain fatty acid concentration and changes in clinical outcomes. Data is Spearman's rho (p-value), significant correlations are highlighted in bold font.

|                           | $\Delta$ Formic acid | $\Delta$ Acetic acid  | $\Delta$ Propionic acid | $\Delta$ Butyric acid | $\Delta$ Isobutyric acid | $\Delta$ Succinic acid | $\Delta$ Valeric acid | $\Delta$ Isovaleric acid | $\Delta$ Capronic acid |
|---------------------------|----------------------|-----------------------|-------------------------|-----------------------|--------------------------|------------------------|-----------------------|--------------------------|------------------------|
| <b>Rye group (n=108)</b>  |                      |                       |                         |                       |                          |                        |                       |                          |                        |
| $\Delta$ weight           | 0.073 (0.450)        | -0.076 (0.437)        | -0.061 (0.535)          | -0.113 (0.252)        | -0.040 (0.684)           | -0.078 (0.421)         | 0.077 (0.432)         | 0.048 (0.626)            | -0.095 (0.329)         |
| $\Delta$ Fat mass         | 0.010 (0.922)        | -0.049 (0.612)        | -0.149 (0.126)          | -0.188 (0.055)        | -0.044 (0.650)           | -0.049 (0.615)         | 0.110 (0.260)         | 0.063 (0.519)            | -0.125 (0.198)         |
| $\Delta$ Fat%             | -0.040 (0.680)       | -0.041 (0.671)        | <b>-0.206 (0.034)</b>   | <b>-0.193 (0.049)</b> | -0.061 (0.533)           | -0.013 (0.897)         | 0.145 (0.136)         | 0.032 (0.740)            | -0.095 (0.328)         |
| $\Delta$ CRP              | -0.168 (0.082)       | 0.107 (0.272)         | 0.024 (0.807)           | -0.015 (0.877)        | 0.024 (0.805)            | <b>-0.211 (0.028)</b>  | 0.034 (0.728)         | 0.052 (0.592)            | -0.072 (0.458)         |
| $\Delta$ Glucose          | -0.013 (0.894)       | -0.046 (0.640)        | <b>0.239 (0.013)</b>    | <b>0.245 (0.012)</b>  | -0.071 (0.465)           | -0.031 (0.748)         | 0.183 (0.060)         | -0.128 (0.188)           | -0.057 (0.556)         |
| $\Delta$ Insulin          | 0.005 (0.959)        | -0.043 (0.655)        | 0.142 (0.144)           | 0.080 (0.416)         | -0.037 (0.704)           | 0.017 (0.860)          | 0.054 (0.582)         | <b>-0.190 (0.049)</b>    | -0.031 (0.749)         |
| $\Delta$ total chol.      | -0.078 (0.423)       | -0.177 (0.067)        | -0.1412 (0.145)         | -0.155 (0.114)        | 0.020 (0.835)            | 0.113 (0.243)          | 0.045 (0.642)         | 0.063 (0.518)            | -0.012 (0.900)         |
| $\Delta$ LDL chol.        | 0.135 (0.165)        | -0.078 (0.421)        | -0.133 (0.171)          | -0.181 (0.065)        | 0.060 (0.543)            | 0.099 (0.307)          | 0.013 (0.892)         | 0.119 (0.221)            | 0.082 (0.398)          |
| $\Delta$ HDL chol.        | -0.105 (0.278)       | -0.100 (0.302)        | -0.124 (0.204)          | -0.097 (0.327)        | 0.010 (0.915)            | 0.071 (0.466)          | 0.077 (0.428)         | 0.054 (0.580)            | -0.019 (0.841)         |
| $\Delta$ Triglyceride     | 0.027 (0.779)        | <b>-0.221 (0.022)</b> | 0.055 (0.572)           | 0.030 (0.763)         | 0.004 (0.965)            | 0.030 (0.755)          | -0.057 (0.558)        | -0.147 (0.130)           | -0.051 (0.603)         |
| <b>Wheat group (n=99)</b> |                      |                       |                         |                       |                          |                        |                       |                          |                        |
| $\Delta$ weight           | -0.037 (0.716)       | -0.065 (0.523)        | -0.015 (0.880)          | 0.130 (0.210)         | <b>-0.202 (0.045)</b>    | <b>-0.213 (0.035)</b>  | -0.120 (0.237)        | -0.080 (0.431)           | -0.050 (0.624)         |

|                      |                |                |                      |                      |                       |                       |                |                       |                |
|----------------------|----------------|----------------|----------------------|----------------------|-----------------------|-----------------------|----------------|-----------------------|----------------|
| <b>ΔFat mass</b>     | -0.056 (0.580) | -0.066 (0.518) | -0.060 (0.558)       | 0.107 (0.302)        | -0.197 (0.051)        | <b>-0.266 (0.008)</b> | -0.029 (0.775) | -0.078 (0.440)        | -0.063 (0.534) |
| <b>ΔFat%</b>         | -0.018 (0.86)  | -0.069 (0.497) | -0.082 (0.422)       | 0.067 (0.516)        | -0.148 (0.145)        | <b>-0.239 (0.017)</b> | 0.025 (0.807)  | -0.072 (0.479)        | -0.081 (0.426) |
| <b>ΔCRP</b>          | -0.159 (0.116) | -0.112 (0.269) | -0.173 (0.088)       | -0.043 (0.682)       | 0.049 (0.632)         | 0.007 (0.948)         | -0.147 (0.147) | 0.183 (0.070)         | -0.011 (0.910) |
| <b>ΔGlucose</b>      | 0.065 (0.524)  | -0.140 (0.166) | 0.149 (0.143)        | <b>0.202 (0.049)</b> | -0.003 (0.980)        | 0.0273 (0.789)        | -0.079 (0.434) | <b>-0.209 (0.038)</b> | 0.054 (0.596)  |
| <b>ΔInsulin</b>      | 0.142 (0.160)  | 0.1763 (0.081) | <b>0.224 (0.027)</b> | 0.173 (0.094)        | -0.070 (0.490)        | 0.061 (0.548)         | -0.064 (0.529) | <b>-0.291 (0.004)</b> | 0.059 (0.560)  |
| <b>Δtotal chol.</b>  | 0.145 (0.153)  | 0.0359 (0.724) | 0.176 (0.0835)       | 0.132 (0.204)        | -0.048 (0.639)        | <b>-0.224 (0.026)</b> | 0.135 (0.182)  | -0.059 (0.560)        | 0.094 (0.355)  |
| <b>ΔLDL chol.</b>    | -0.015 (0.886) | 0.0743 (0.465) | 0.016 (0.874)        | 0.045 (0.664)        | 0.037 (0.719)         | -0.100 (0.324)        | 0.017 (0.866)  | 0.115 (0.259)         | 0.057 (0.575)  |
| <b>ΔHDL chol.</b>    | -0.037 (0.716) | -0.065 (0.523) | -0.015 (0.880)       | 0.130 (0.210)        | <b>-0.202 (0.045)</b> | <b>-0.213 (0.035)</b> | -0.120 (0.237) | -0.080 (0.431)        | -0.050 (0.624) |
| <b>ΔTriglyceride</b> | -0.056 (0.580) | -0.066 (0.518) | -0.060 (0.558)       | 0.107 (0.302)        | -0.197 (0.051)        | <b>-0.266 (0.008)</b> | -0.029 (0.775) | -0.078 (0.440)        | -0.063 (0.534) |

Abbreviations: CRP, C-reactive protein; chol, cholesterol; LDL chol, low density lipoprotein cholesterol; HDL chol, high density lipoprotein cholesterol.
